# Supplementary material
Source: MDPI journal article supplement (https://www.mdpi.com/2504-477X/4/1/18)
Supplement: s1 [file s1]

# Supplementary Materials: Preparation of Multicomponent Biocomposites and Characterization of their Physicochemical and Mechanical Properties

Yuriy A. Anisimov <sup>1</sup>, Duncan E. Cree <sup>2,\*</sup> and Lee D. Wilson <sup>1,\*</sup>

<sup>1</sup> Department of Chemistry, University of Saskatchewan, Saskatoon, SK. S7N 5C9, Canada; iaa365@mail.usask.ca

<sup>2</sup> Department of Mechanical Engineering, University of Saskatchewan, Saskatoon, SK. S7N 5A9, Canada

\* Correspondence: duncan.cree@usask.ca (D.E.C.); lee.wilson@usask.ca (L.D.W.); Tel.: +1-306-966-3244 (D.E.C.); +1-306-966-2961 (L.D.W.)

**Table S1.** List of shorthand notation used in this study.

| Abbreviation | Compound            | CHT, wt. %               | PANI, wt. % | PVA, wt. % |
|--------------|---------------------|--------------------------|-------------|------------|
| CHT          | chitosan            | 100                      | 0           | 0          |
| PANI         | polyaniline         | 0                        | 100         | 0          |
| PVA          | polyvinyl alcohol   | 0                        | 0           | 100        |
| APS          | ammonium persulfate | polymerization initiator |             |            |
| CHP25        | binary composite    | 25                       | 75          | 0          |
| CHP50        | binary composite    | 50                       | 50          | 0          |
| CHP75        | binary composite    | 75                       | 25          | 0          |
| CHP25-PVA*   | ternary composite   | 25                       | 75          | 70**       |
| CHP50-PVA    | ternary composite   | 50                       | 50          | 70**       |
| CHP75-PVA    | ternary composite   | 75                       | 25          | 70**       |
| CHP25-PVA50  | ternary composite   | 25                       | 75          | 50***      |
| CHP50-PVA50  | ternary composite   | 50                       | 50          | 50***      |
| CHP75-PVA50  | ternary composite   | 75                       | 25          | 50***      |
| MB           | methylene blue      | dye for adsorption study |             |            |
| FL           | fluorescein         | dye for adsorption study |             |            |

\*CHP##-PVA is denoted as CHP##-PVA70, in order to highlight the content of PVA; \*\*70% PVA and 30% CHP; \*\*\*50% PVA and 50% CHP; Acid-doped samples were denoted by the mark “doped” in this work

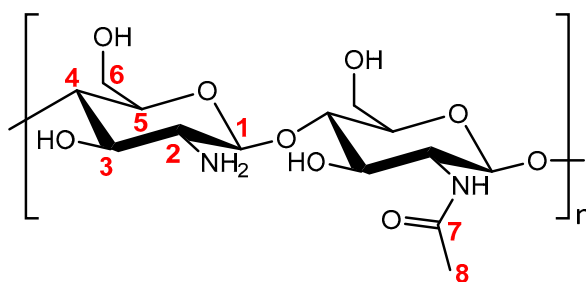

**Figure S1.** Numbering assignment scheme of chitosan <sup>13</sup>carbon atoms [1].

**Table S2.** FTIR bands of PANI-CHT-PVA composites.

| Wavenumber (cm <sup>-1</sup> ) | Assignment                                                 | Polymer Material |
|--------------------------------|------------------------------------------------------------|------------------|
| 3259-3276 (3266)*              | Hydrogen bonding N-H stretching                            | PANI             |
| 2937-2945 (2946)*              | C-H from the alkyl groups                                  | PVA              |
| 2907-2910 (2917)*              | C-H symmetric stretching                                   | CHT              |
| 1660 (1655)*                   | C=O stretching of amide                                    | CHT              |
| 1588 (1586)*                   | Quinoid (Q) ring stretching                                | PANI             |
| 1545 (1543)*                   | N-H bending of amide                                       | CHT              |
| 1495-1500 (1511)*              | Benzenoid (B) ring stretching                              | PANI             |
| 1443-1446 (1445)*              | C=C stretching of aromatic ring/N=N stretching             | PANI             |
| 1428 (1427)*                   | stretching and bending vibrations of -CH <sub>2</sub>      | CHT              |
| 1417 (1413)*                   | Phenazine ring stretching                                  | PANI             |
| 1376-1378 (1378)*              | C-N stretching in QBQ units                                | PANI             |
| 1316 (1315)*                   | stretching and bending vibrations of -OH                   | CHT              |
| 1303-1308 (1302)*              | $\nu$ (C-N) of secondary aromatic amine                    | PANI             |
| 1236-1239 (1240)*              | $\nu$ (C-N) BBB unit                                       | PANI             |
| 1164-1166 (1160)*              | B-NH-B/ $\delta$ (C-H)                                     | PANI             |
| 1139-1141 (1143)*              | C-O (crystallinity)                                        | PVA              |
| 1069-1086 (1061)*              | C-O stretching                                             | PVA              |
| 1034 (1026)*                   | C-O stretching                                             | CHT              |
| 827-835 (827)*                 | $\gamma$ (C-H) (1,4-disubstituted ring)/Q ring deformation | PANI             |

\*Literature values obtained from Ref. [2-5]

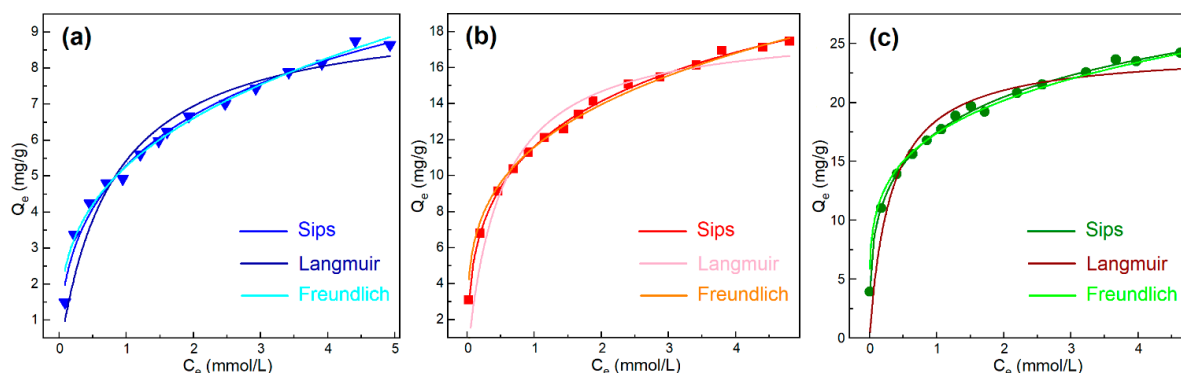

**Figure S2.** Fitting lines for (a) CHP25-PVA, (b) CHP50-PVA and (c) CHP75-PVA MB equilibrium uptake according to the various isotherm models. The error bars were determined using OriginLab 2019 software (see Table S3).

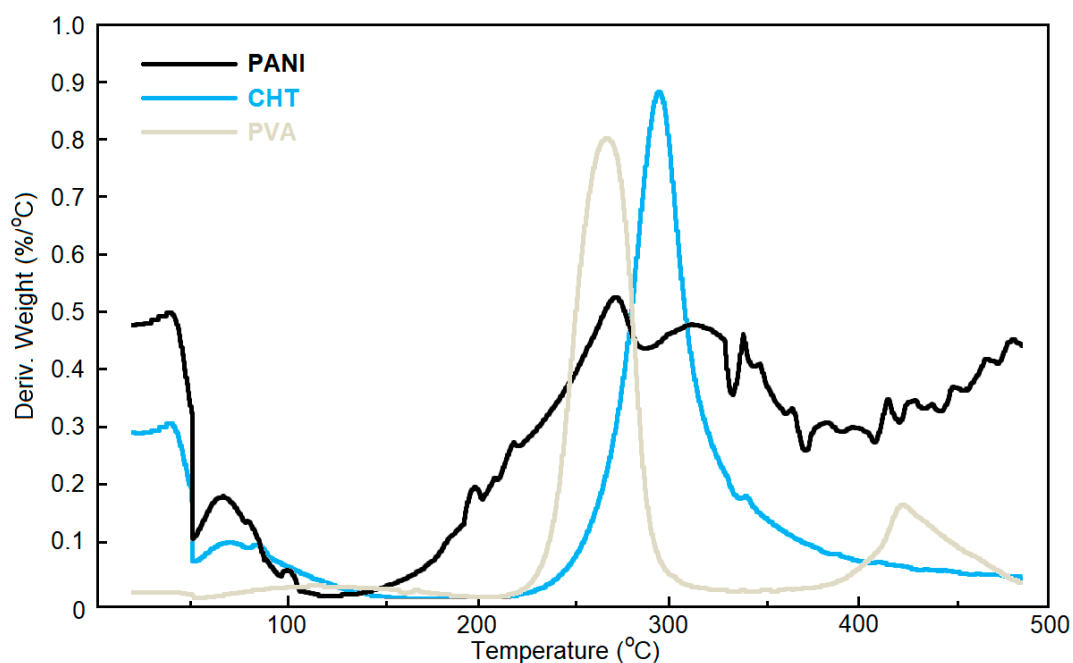

**Figure S3.** Thermogravimetry profiles of pristine components – PANI, CHT and PVA.

**Table S3.** Error bars for the adsorption experiments shown in Figure S2.

| Sample    | Model           | Sips                             | Langmuir                 | Freundlich             |
|-----------|-----------------|----------------------------------|--------------------------|------------------------|
|           | Parameters      |                                  |                          |                        |
|           | Equation        | $y = \frac{q(kx)^n}{1 + (kx)^n}$ | $y = \frac{qkx}{1 + kx}$ | $y = kx^{\frac{1}{n}}$ |
|           | Plot            | $q_e = f(C_e)$                   | $q_e = f(C_e)$           | $q_e = f(C_e)$         |
| CHP25-PVA | $q$             | $19.112 \pm 6.271$               | $9.6414 \pm 0.0302$      | —                      |
|           | $k$             | $0.38222 \pm 0.17865$            | $1.2839 \pm 0.0155$      | $5.2642 \pm 0.0179$    |
|           | $n$             | $0.49157 \pm 0.07528$            | —                        | $3.0656 \pm 0.0286$    |
|           | Reduced Chi-Sqr | 0.05777                          | 0.07961                  | 0.14234                |
|           | R-Square (COD)  | 0.98829                          | 0.96879                  | 0.94544                |
|           | Adj. R-Square   | 0.98633                          | 0.96876                  | 0.94538                |
|           |                 |                                  |                          |                        |
| CHP50-PVA | $q$             | $37.785 \pm 4.132$               | $18.396 \pm 0.690$       | —                      |
|           | $k$             | $0.44359 \pm 0.07228$            | $1.9719 \pm 0.3190$      | $11.585 \pm 0.036$     |
|           | $n$             | $0.42989 \pm 0.02335$            | —                        | $3.7293 \pm 0.0392$    |
|           | Reduced Chi-Sqr | 0.03039                          | 0.95926                  | 0.63602                |
|           | R-Square (COD)  | 0.99846                          | 0.94718                  | 0.92940                |
|           | Adj. R-Square   | 0.99820                          | 0.94312                  | 0.92933                |
|           |                 |                                  |                          |                        |
| CHP75-PVA | $q$             | $51.542 \pm 6.174$               | $24.413 \pm 0.870$       | —                      |
|           | $k$             | $0.51174 \pm 0.09540$            | $3.0945 \pm 0.5700$      | $17.358 \pm 0.049$     |

|                 |                   |         |                 |
|-----------------|-------------------|---------|-----------------|
| <i>n</i>        | 0.36176 ± 0.02254 | —       | 4.6487 ± 0.0571 |
| Reduced Chi-Sqr | 0.07016           | 2.1091  | 1.2815          |
| R-Square (COD)  | 0.99798           | 0.93407 | 0.90318         |
| Adj. R-Square   | 0.99764           | 0.92900 | 0.90308         |

**Table S4.** Mean densities of polymer composite materials based on geometric volume determination\* of the film\*\*.

| Sample    | Experimental Density, g/cm <sup>3</sup> | Theoretical Density***, g/cm <sup>3</sup> |
|-----------|-----------------------------------------|-------------------------------------------|
| CHP25-PVA | 1.03 ± 0.03                             | 1.20                                      |
| CHP50-PVA | 0.83 ± 0.06                             | 1.14                                      |
| CHP75-PVA | 0.64 ± 0.03                             | 1.08                                      |

\*Geometric volume determination was conducted by digital caliper with the systematic error ±0.0025 cm. However, the random errors of the experiment are nearly 10-fold higher and therefore the instrumental error could be neglected. Sample weights were measured with an analytical balance with ±0.00001 g precision. Therefore, the error contribution to the overall density is negligibly small. \*\*This method does not account for the porosity of samples directly; however, data was averaged over 15 samples that reveal a clear trend, where *greater chitosan content results in lower density*. A lower density indicates a more porous material.

\*\*\*Theoretical density was calculated based on the rule of mixtures formula (Equation (S1)):

$$\rho = \frac{\rho_1 \rho_2 \rho_3}{\omega_1 \rho_2 \rho_3 + \omega_2 \rho_1 \rho_3 + \omega_3 \rho_1 \rho_2} \quad (S1),$$

where  $\rho_i$  and  $\omega_i$  are the density and mass fractions of the single components, respectively. Numbers 1, 2 and 3 correspond to PANI, CHT and PVA, respectively. The density of PANI (in its base form) was 1.24 g/cm<sup>3</sup> [6], CHT and PVA are 0.7 and 1.29 g/cm<sup>3</sup>, respectively (see section 2.1 above).

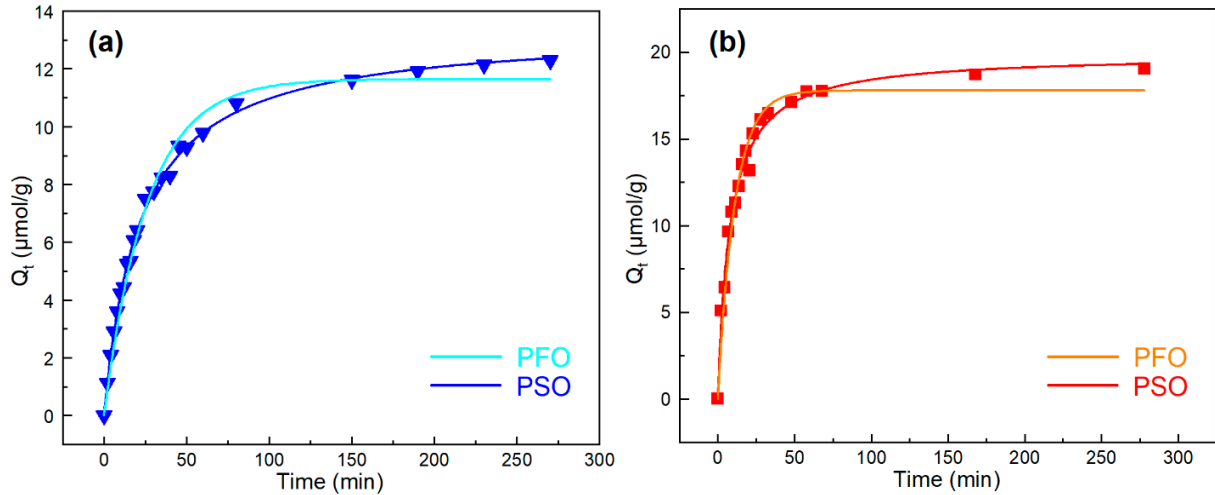

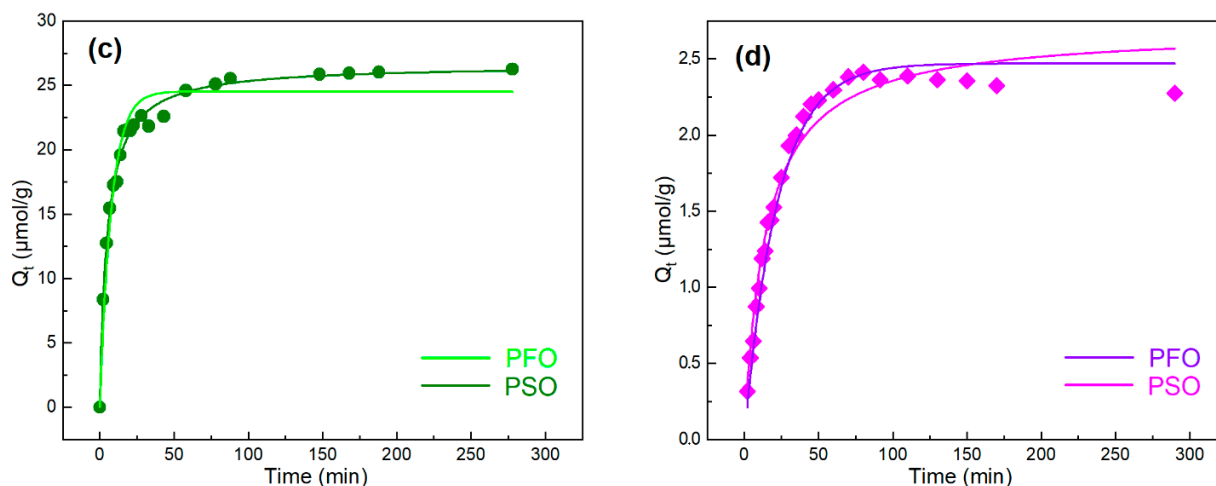

**Figure S4.** Fitting lines for (a) CHP25-PVA, (b) CHP50-PVA, (c) CHP75-PVA and (d) pristine CHT MB kinetic uptake according to the PFO and PSO models. The error bars were determined using OriginLab 2019 software (see Table S5).

**Table S5.** Error bars for the adsorption experiments shown in Figure S4.

| Sample    | Model           | Pseudo-First Order     | Pseudo-second Order                |
|-----------|-----------------|------------------------|------------------------------------|
|           | Parameters      |                        |                                    |
|           | Equation        | $y = q(1 - e^{-kx})$   | $y = \frac{q^2 kx}{1 + qkx}$       |
| CHP25-PVA | Plot            | $Q_t = f(t)$           | $Q_t = f(t)$                       |
|           | $q$             | $11.64 \pm 0.20$       | $13.36 \pm 0.11$                   |
|           | $k$             | $0.03821 \pm 0.00174$  | $(3.431 \pm 0.115) \times 10^{-3}$ |
|           | Reduced Chi-Sqr | $1.979 \times 10^{-7}$ | $3.231 \times 10^{-8}$             |
|           | R-Square (COD)  | 0.9859                 | 0.9977                             |
|           | Adj. R-Square   | 0.9852                 | 0.9976                             |
|           |                 |                        |                                    |
| CHP50-PVA | $q$             | $17.78 \pm 0.37$       | $19.87 \pm 0.30$                   |
|           | $k$             | $0.09079 \pm 0.00621$  | $(6.353 \pm 0.465) \times 10^{-3}$ |
|           | Reduced Chi-Sqr | $7.738 \times 10^{-7}$ | $2.754 \times 10^{-7}$             |
|           | R-Square (COD)  | 0.9727                 | 0.9903                             |
|           | Adj. R-Square   | 0.9710                 | 0.9897                             |
|           |                 |                        |                                    |
|           |                 |                        |                                    |
| CHP75-PVA | $q$             | $24.52 \pm 0.43$       | $26.59 \pm 0.23$                   |
|           | $k$             | $0.12785 \pm 0.00988$  | $(7.478 \pm 0.403) \times 10^{-3}$ |
|           | Reduced Chi-Sqr | $1.896 \times 10^{-6}$ | $3.229 \times 10^{-7}$             |
|           | R-Square (COD)  | 0.9587                 | 0.9930                             |
|           | Adj. R-Square   | 0.9565                 | 0.9926                             |
|           |                 |                        |                                    |
|           |                 |                        |                                    |
| CHT       | $q$             | $2.47 \pm 0.003$       | $2.69 \pm 0.06$                    |
|           | $k$             | $0.04473 \pm 0.00039$  | $0.02591 \pm 2.64$                 |

|                 |                        |                        |
|-----------------|------------------------|------------------------|
| Reduced Chi-Sqr | $7.495 \times 10^{-9}$ | $1.408 \times 10^{-8}$ |
| R-Square (COD)  | 0.9531                 | 0.9701                 |
| Adj. R-Square   | 0.9531                 | 0.9688                 |

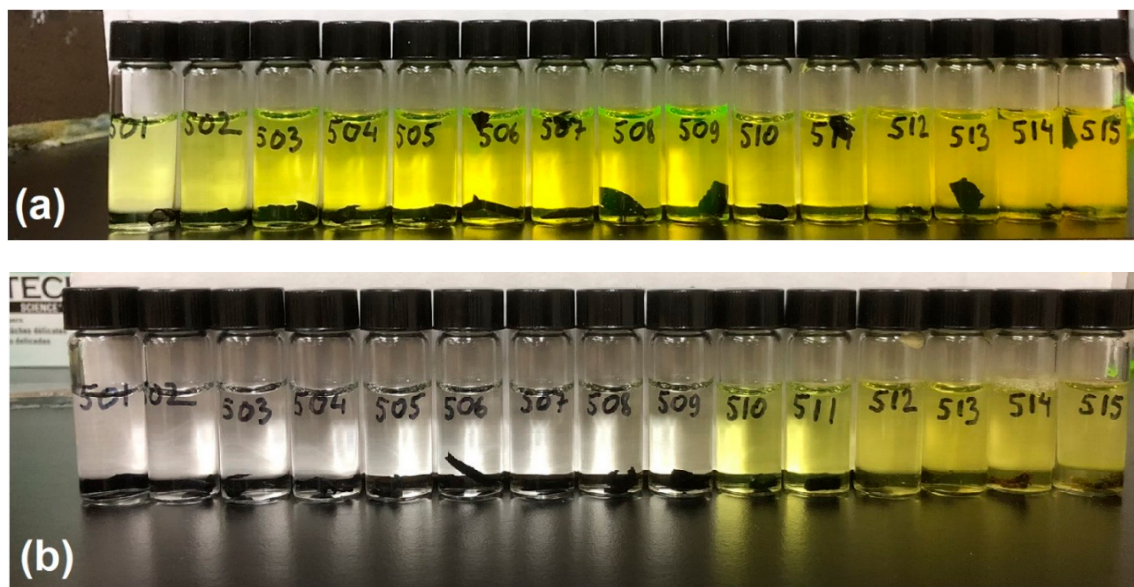

**Figure S5.** Batch adsorption experiment that illustrates decolorization of FL solutions by the PANI-based adsorbent at pH 7: (a) initial solutions (before adsorption); (b) after 24 h (after adsorption). The vials numbered 501–515 indicate that this experiment was conducted for CHP25-PVA doped (#5) in the range of FL concentrations 20 to 500  $\mu\text{M}$  (#01 to #15).

**Table S6.** Water vapor adsorption parameters of the doped and undoped composites in their film form.

|                 | Adsorption            |      |      |       | Desorption            |        |         |       |
|-----------------|-----------------------|------|------|-------|-----------------------|--------|---------|-------|
|                 | $\omega_{max}$<br>(%) | $a$  | $b$  | $R^2$ | $\omega_{max}$<br>(%) | $c$    | $d$     | $R^2$ |
| CHP25-PVA doped | 267                   | 1.77 | 3.92 | 0.996 | 267                   | 0.0233 | −0.0201 | 0.999 |
| CHP50-PVA doped | 308                   | 1.71 | 4.13 | 1.000 | 308                   | 0.0207 | −0.0179 | 0.997 |
| CHP75-PVA doped | 336                   | 1.25 | 4.68 | 0.993 | 336                   | 0.0205 | −0.0180 | 0.998 |
| CHP25-PVA       | 224                   | 1.91 | 3.57 | 0.993 | 224                   | 0.0247 | −0.0208 | 0.998 |
| CHP50-PVA       | 230                   | 1.09 | 4.46 | 0.999 | 230                   | 0.0252 | −0.0215 | 0.998 |
| CHP75-PVA       | 241                   | 1.53 | 4.05 | 0.993 | 241                   | 0.0237 | −0.0201 | 0.998 |

**Table S7.** Current-voltage parameters for the I-V curves of samples in their film form. .

|     | Film              | $\beta$ | $K$ ( $\mu\text{A}\cdot\text{cm}^{-2}\cdot\text{V}^{-\beta}$ ) | $R^2$ |
|-----|-------------------|---------|----------------------------------------------------------------|-------|
|     |                   |         |                                                                |       |
| (a) | CHP25-PVA70 doped | 1.26    | 0.0122                                                         | 0.998 |
|     | CHP50-PVA70 doped | 2.44    | 0.000350                                                       | 0.999 |
|     | CHP75-PVA70 doped | 1.85    | 0.00193                                                        | 0.999 |

|     |                   |       |       |       |
|-----|-------------------|-------|-------|-------|
|     | CHP25-PVA50 doped | 1.19  | 2.14  | 0.998 |
| (b) | CHP50-PVA50 doped | 1.08  | 1.63  | 0.999 |
|     | CHP75-PVA50 doped | 0.990 | 0.919 | 0.998 |

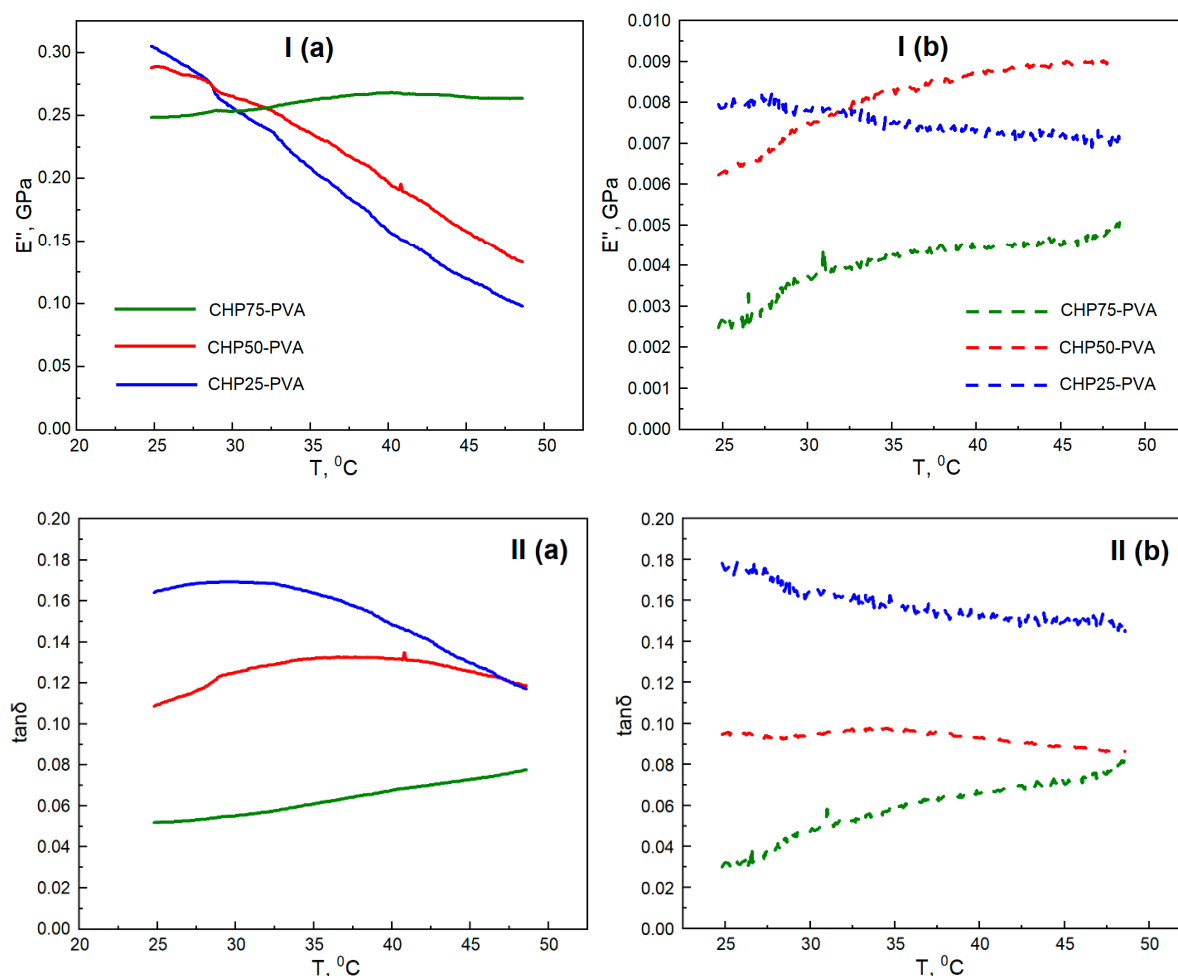

**Figure S6.** DMA mechanical properties of the base-neutralized films in their (a) dry, and (b) wet state: I – loss modulus; II – tan delta.

## References

1. Mahaninia, M.H.; Wilson, L.D. Modular Cross-Linked Chitosan Beads with Calcium Doping for Enhanced Adsorptive Uptake of Organophosphate Anions. *Ind. Eng. Chem. Res.* **2016**, *55*, 11706–11715.
2. Mohamed, M.H.; Dolatkah, A.; Aboumourad, T.; Dehabadi, L.; Wilson, L.D. Investigation of templated and supported polyaniline adsorbent materials. *RSC Adv.* **2015**, *5*, 6976–6984.
3. Do Nascimento, G.M., Spectroscopy of Polyaniline Nanofibers. Available Online: <https://www.intechopen.com/books/nanofibers/spectroscopy-of-polyaniline-nanofibers> (access on 6 February 2020).
4. Trchova, M.; Stejskal, J. Polyaniline: The Infrared Spectroscopy of Conducting Polymer Nanotubes (IUPAC Technical Report). *Pure Appl. Chem.* **2011**, *83*, 1803–1817.

5. Mansur, H.S.; Sadahira, C.M.; Souza, A.N.; Mansur, A.A.P. FTIR Spectroscopy Characterization of Poly (Vinyl Alcohol) Hydrogel with Different Hydrolysis Degree and Chemically Crosslinked with Glutaraldehyde. *Mater. Sci. Eng. C* **2008**, *28*, 539–548.
6. Stejskal, J.; Gilbert, R.G. Polyaniline. Preparation of a Conducting Polymer (IUPAC Technical Report). *Pure Appl. Chem.* **2002**, *74*, 857–867.
